# Supplementary material for: Expression signatures of long non-coding RNA and mRNA in human traumatic brain injury
Source: PubMed Central journal article supplement — Neural Regen Res. 2019 Apr;14(4):632–41. doi: 10.4103/1673-5374.247467 (PMC6352599; doi:10.4103/1673-5374.247467), 2019-04
Supplement: NRR-14-632_Suppl2.pdf [file NRR-14-632_Suppl2.pdf]

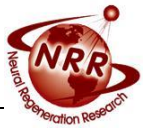

## OPEN PEER REVIEW REPORT 1

### Open peer review report 1

**Reviewer:** Jiang Li, University of Qingdao, China.

.

### Comments to the authors:

It is a well written article,only a few place need to be modified.

- 1.In the mothod chapter,the arthors did not make the grouping clear,should be checked
- 2.The Discussion section was duplicative ,need to be streamlined.
